# Supplementary material for: Quick accessible dual mode turn-on red fluorescent chemosensor for Cu(ii) and its applicability in live cell imaging
Source: Royal Society of Chemistry journal article supplement (doi:10.1039/c3ra42109k), 2013-01-01

# Quick accessible dual mode turn-on red fluorescent chemosensor for Cu(II) and its applicability in live cell imaging.

*Gandhi Sivaraman, Thangaraj Anand, and Duraisamy Chellappa\**

*School of chemistry, Madurai Kamaraj University, Madurai-625021.*

*E-mail: dcmku123@gmail.com*

## Supporting information

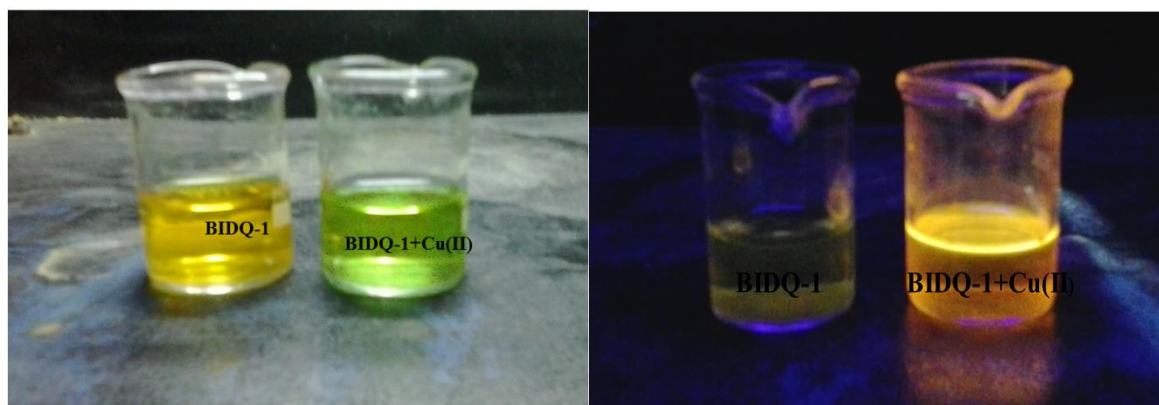

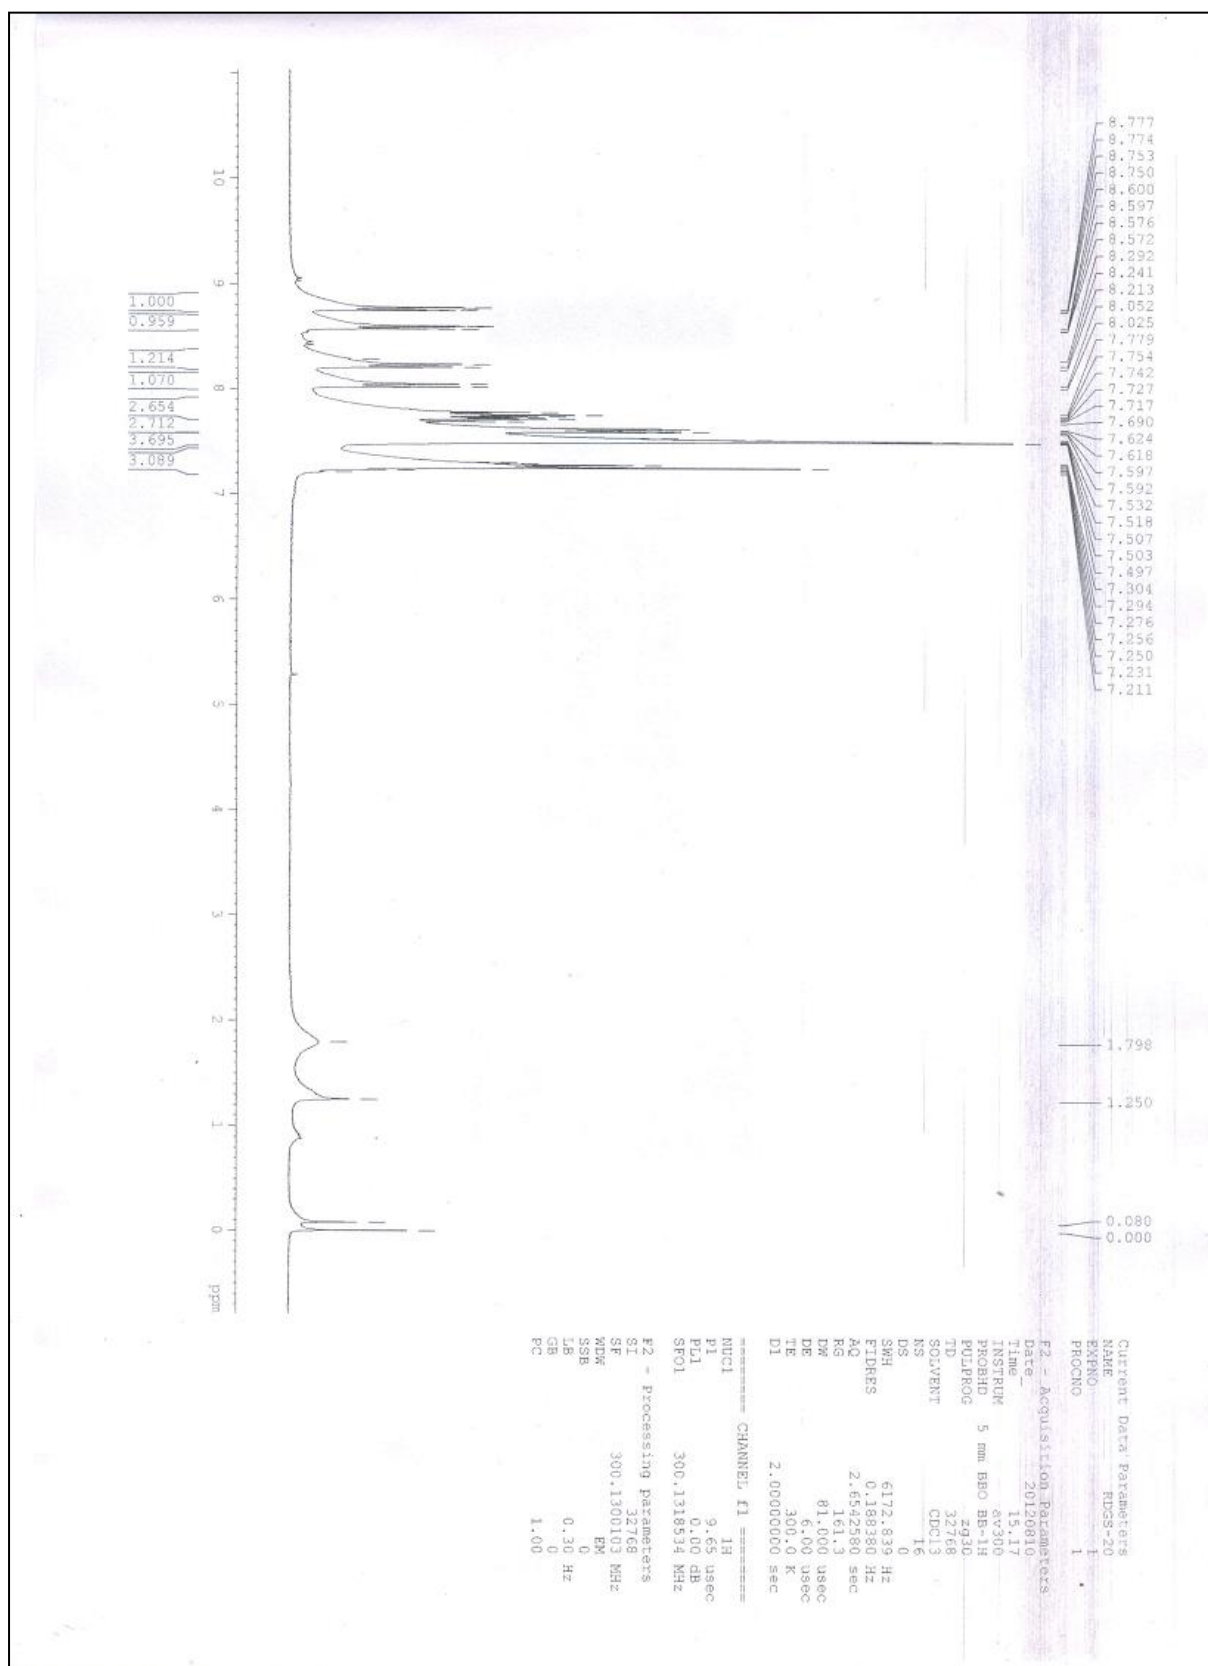

Fig S1: <sup>1</sup>H-NMR spectrum of BIDQ-1.

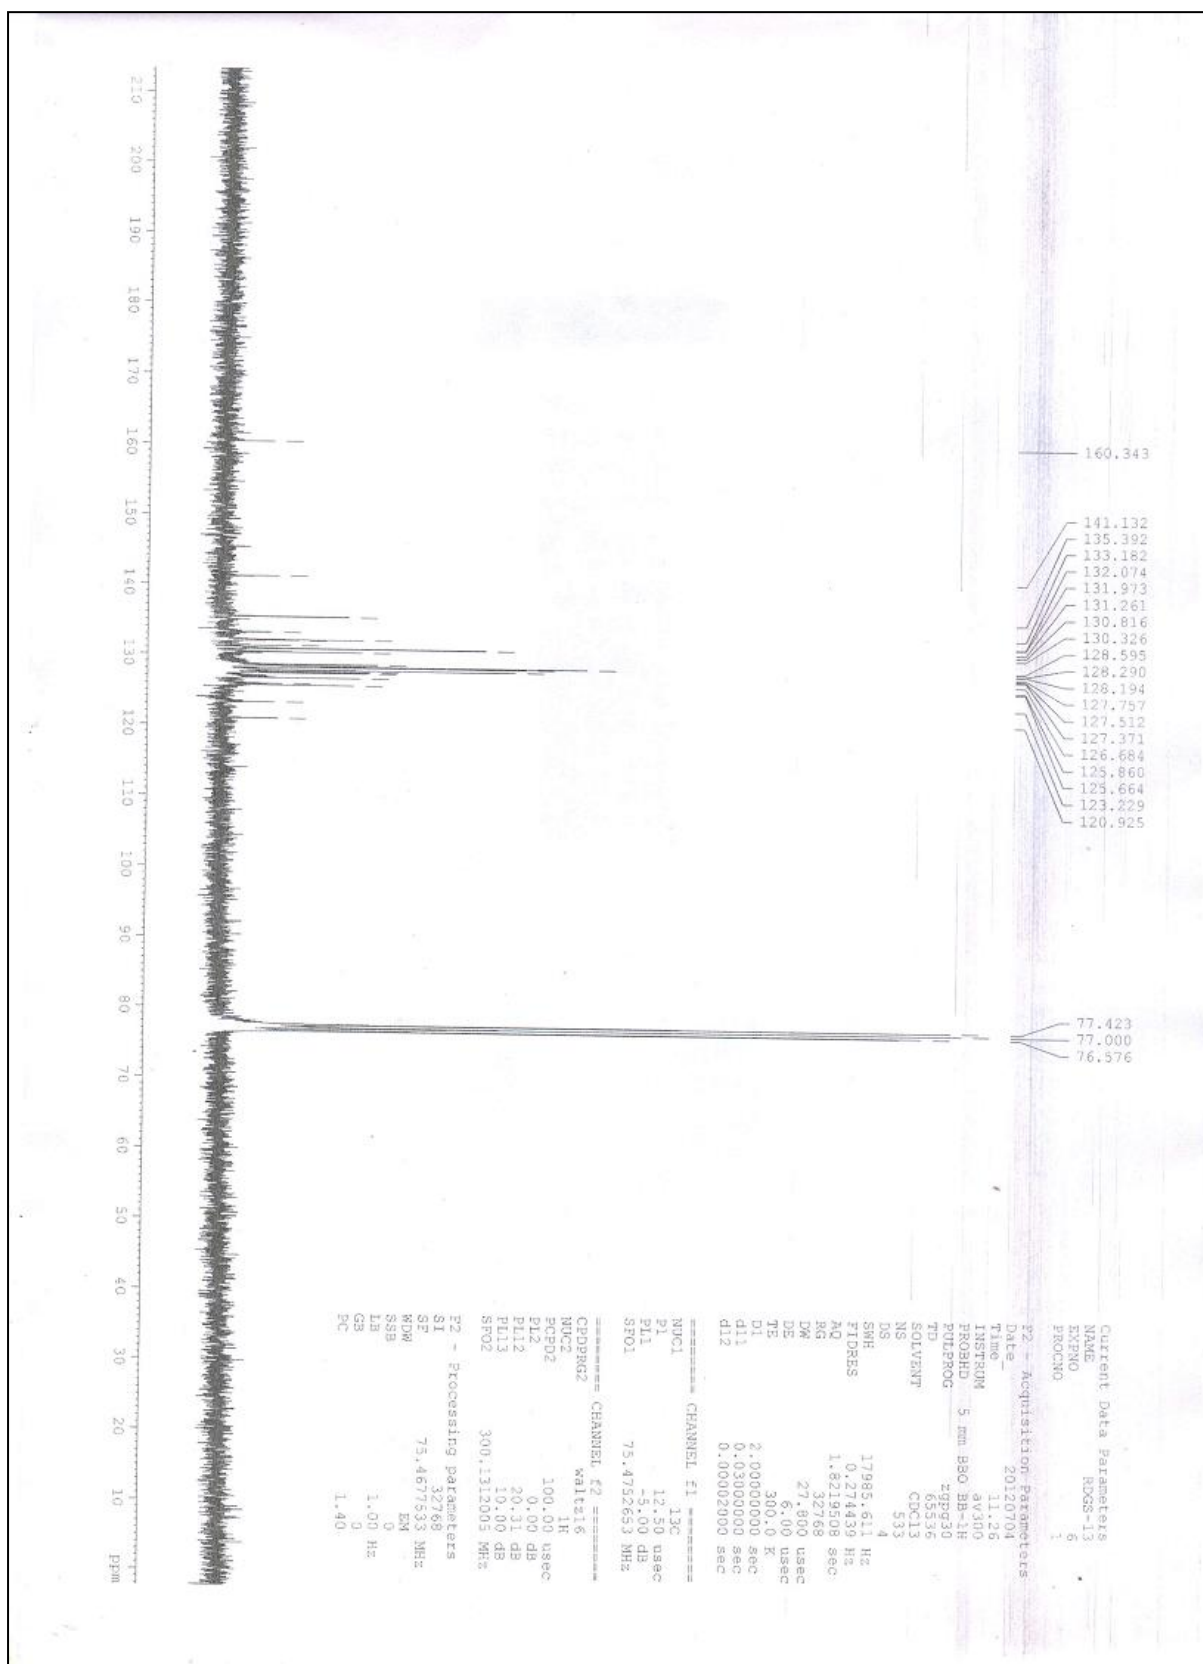

Fig S2: <sup>13</sup>C-NMR spectrum of BIDQ-1.

**Fig S3: ESI-MS spectrum of BIDQ-1**

TAP 30\_130201210100 #23 RT: 0.37 AV: 1 NL: 1.29E3  
T: ITMS + c ESI Full ms [150.00-1000.00]

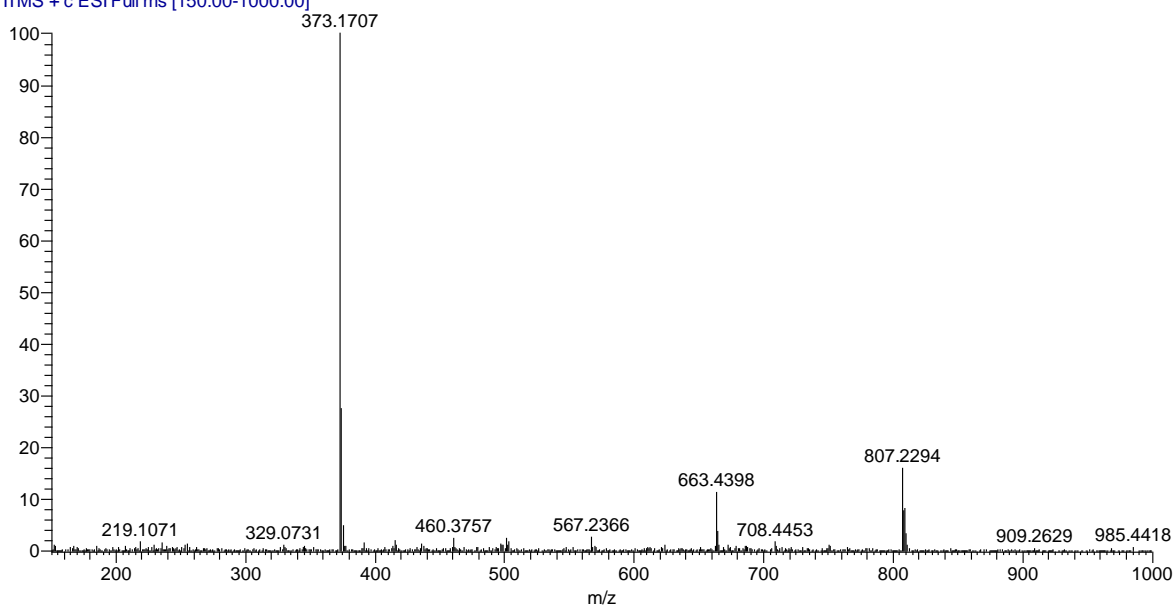

**Figure-S4: Job's plot between BIDQ-1 and Cu<sup>2+</sup>.**

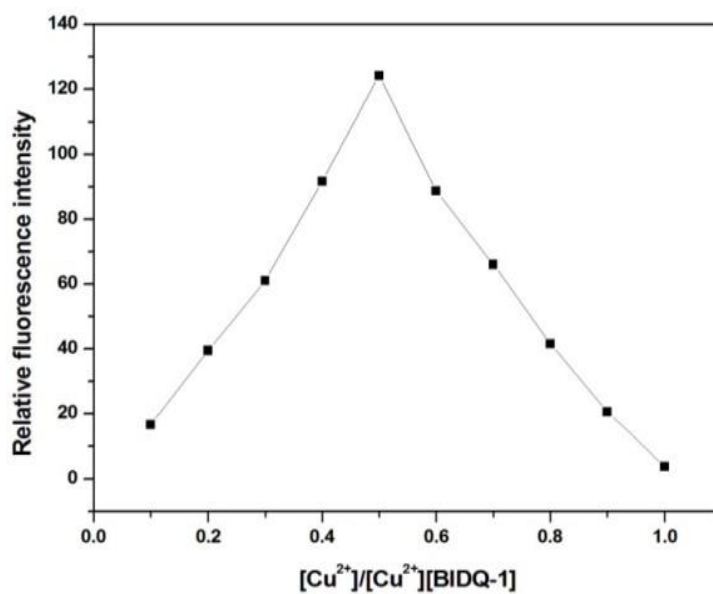

**Fig S5: ESI-MS spectrum of BIDQ-1 + Cu<sup>2+</sup>**

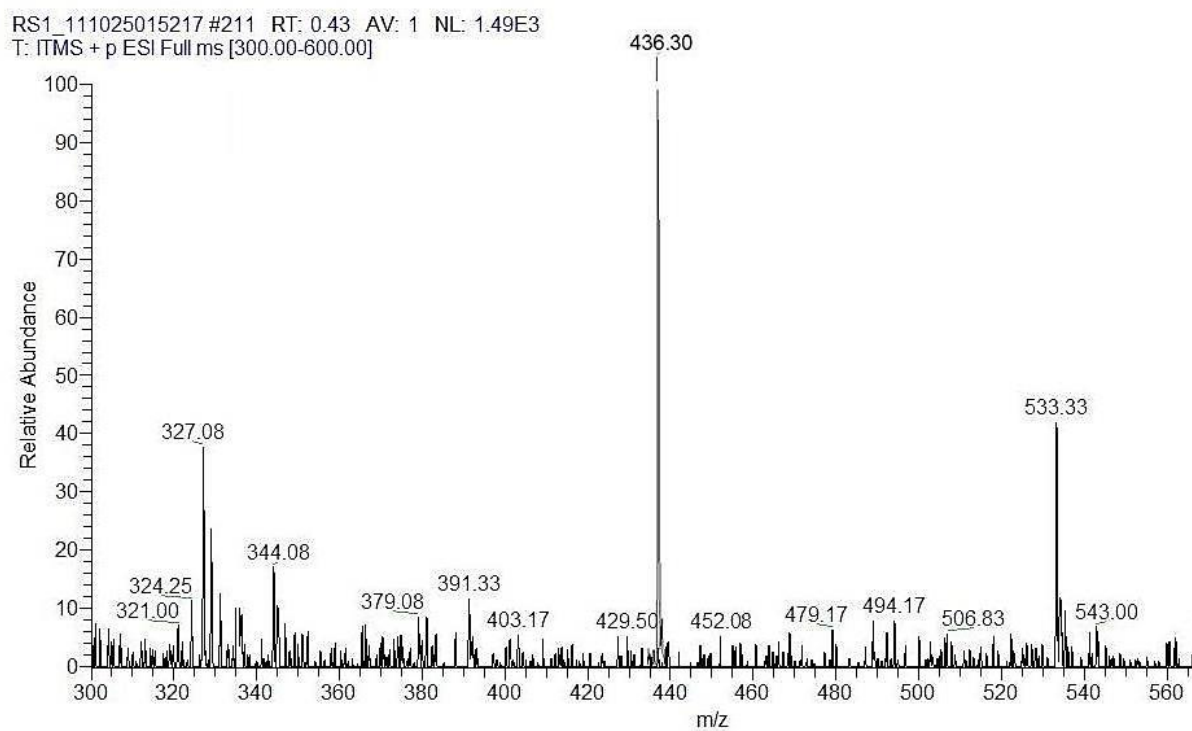

Figure-S6: Frontier molecular orbital diagram of BIDQ-1 and BIDQ-1 + Cu<sup>2+</sup>

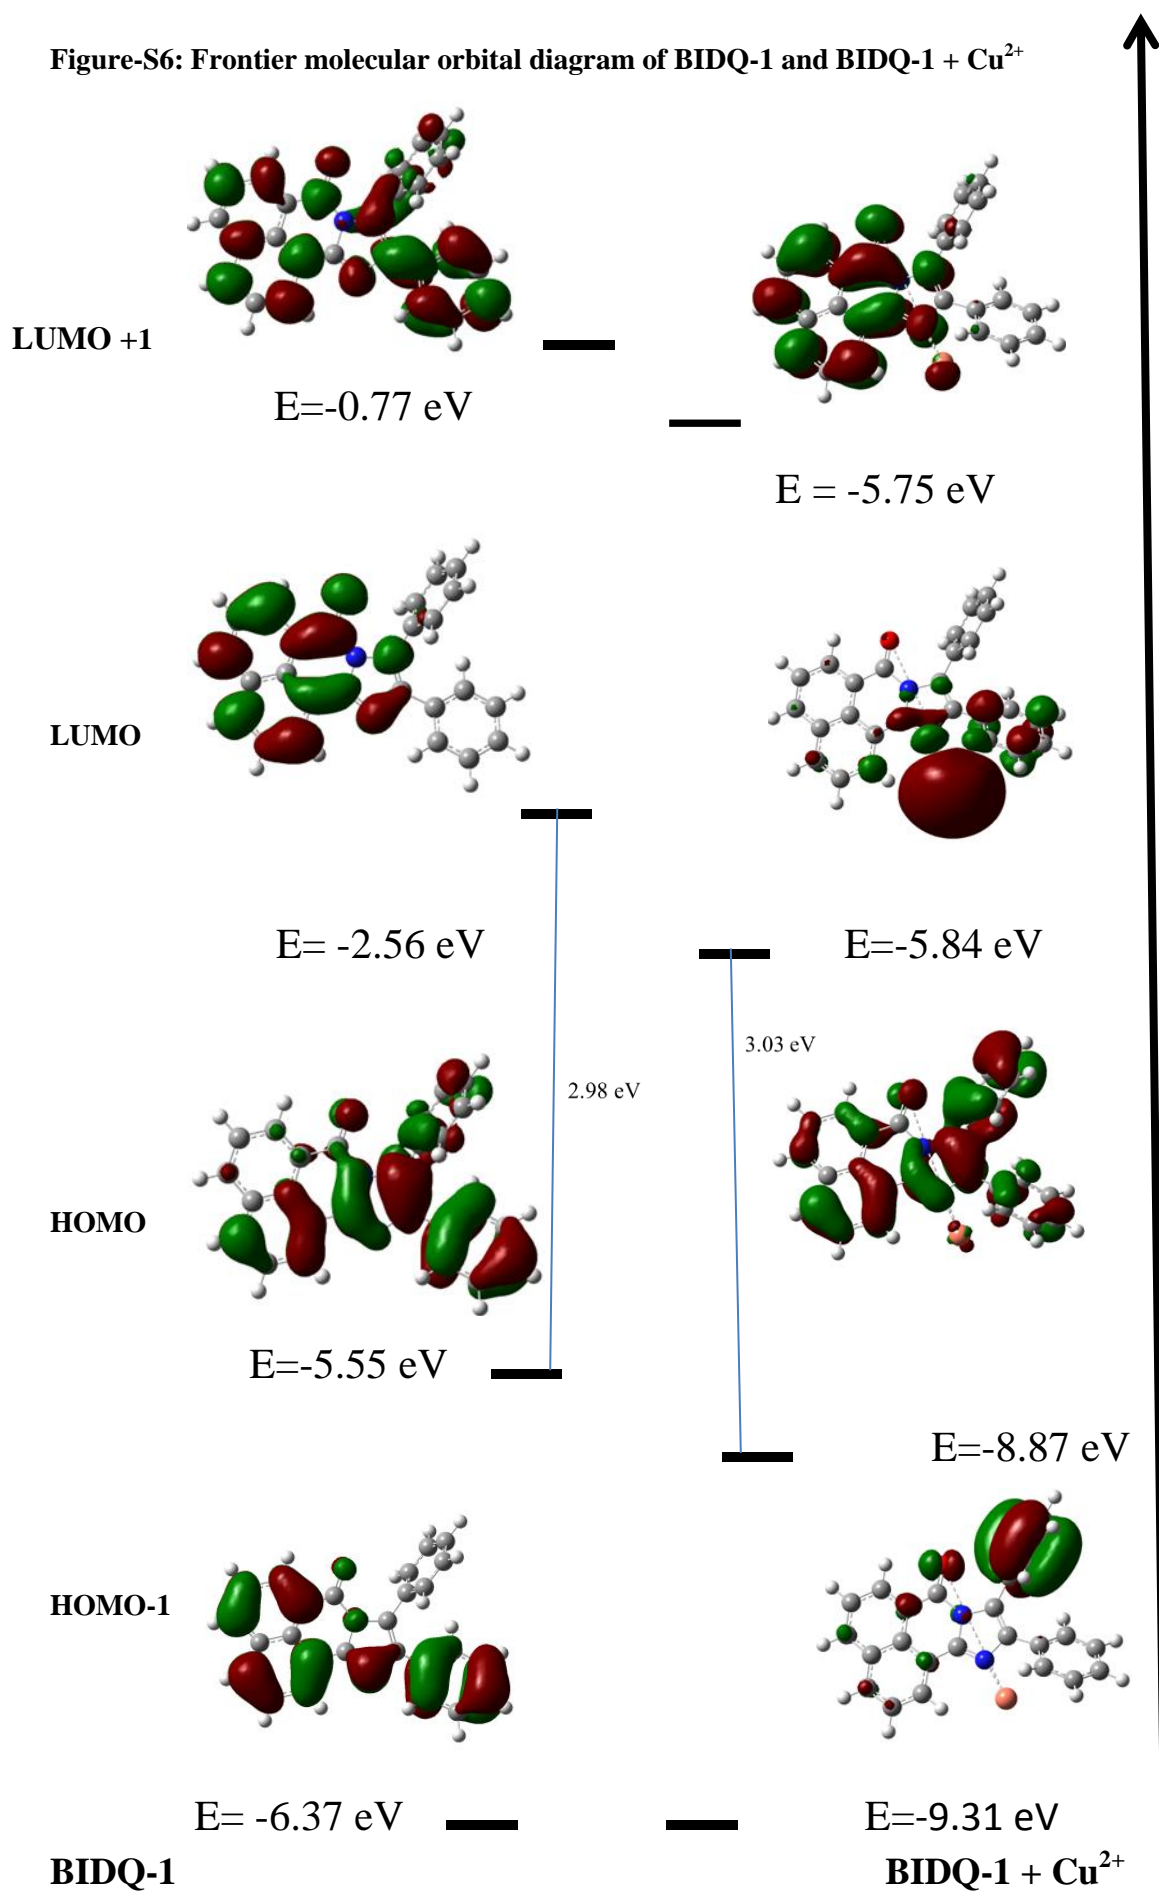

**Fig-S7: Plot of fluorescence emission intensity ratio vs concentration of copper ions**

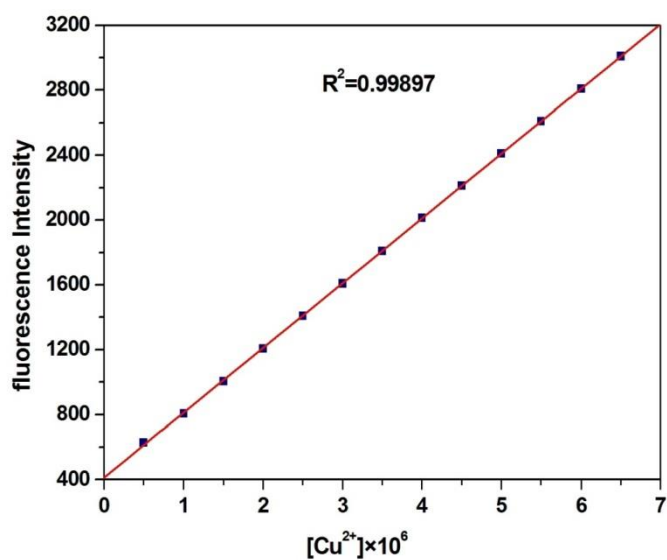

**Fig- S8: Fluorescence response of 1  $\mu$ M BIDQ-1 to various metal ions**

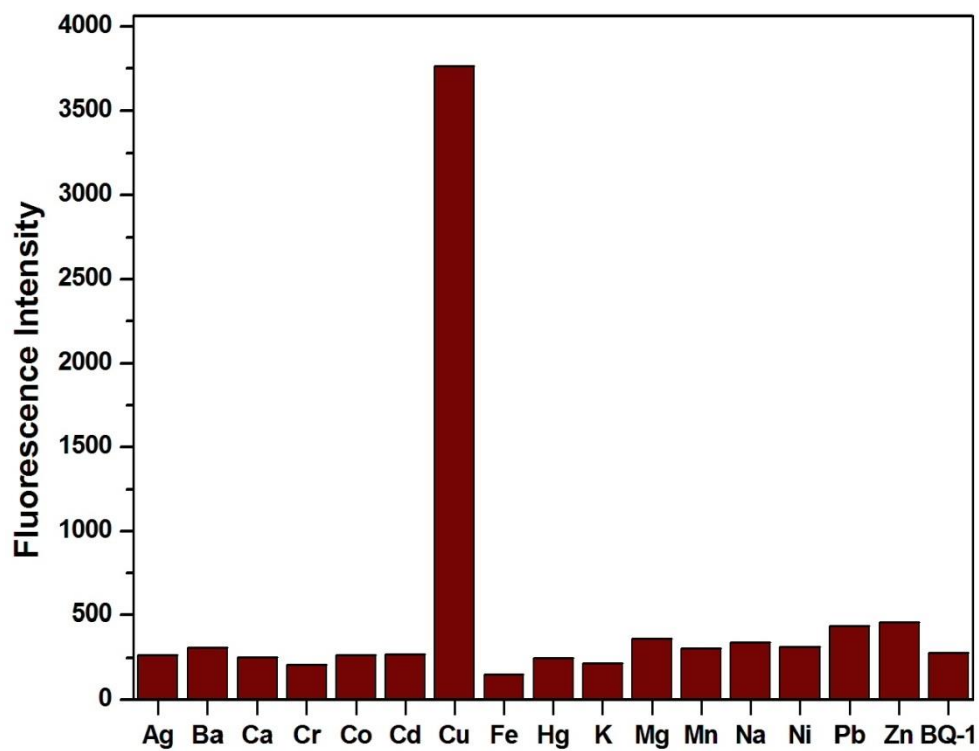

**Fig- S9 : Fluorescence response of 1  $\mu$ M BIDQ-1 to various pH .**

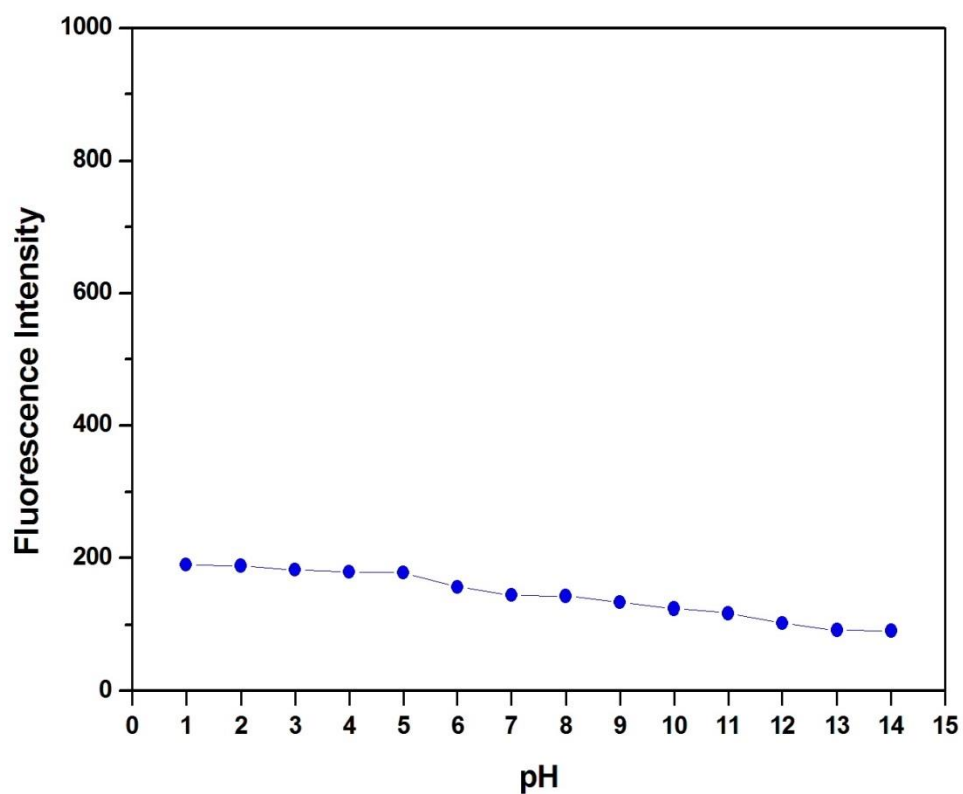

**Fig- S 10 : Time dependent Fluorescence response of 1  $\mu$ M BIDQ-1 to  $\text{Cu}^{2+}$ .**

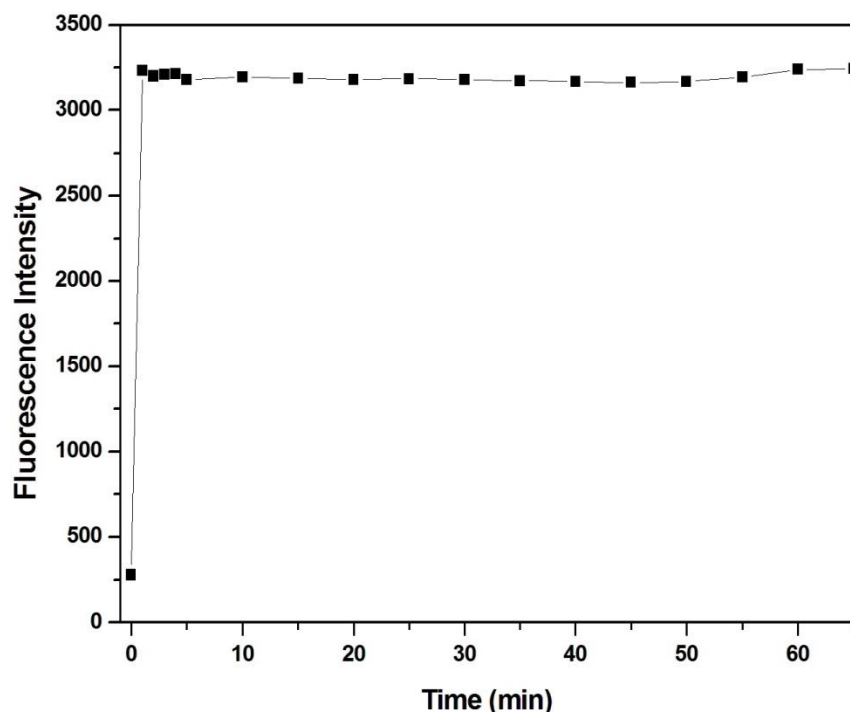



### Calculation of Binding constant:

The binding constant K was determined from the plot of the linear regression of  $\log [(F - F_0) / (F_m - F)]$  vs.  $\log [M]$  in equation to obtain the intercept as  $\log K$  and the slope as n.

$$\log \frac{F - F_0}{F_m - F} = \log K + n \log [M]$$

### Calculation of Detection limit:

The limit of detection was found using this equation.

$$DL = C_L \times C_T$$

$C_L$  = Conc. of Ligand;  $C_T$  = Conc. of Titrant at which change observed.

$$\text{Thus; } DL = 5 \times 10^{-7} \times 0.042 \times 10^{-6} = 0.0021 \times 10^{-6} = 2.1 \times 10^{-9}$$

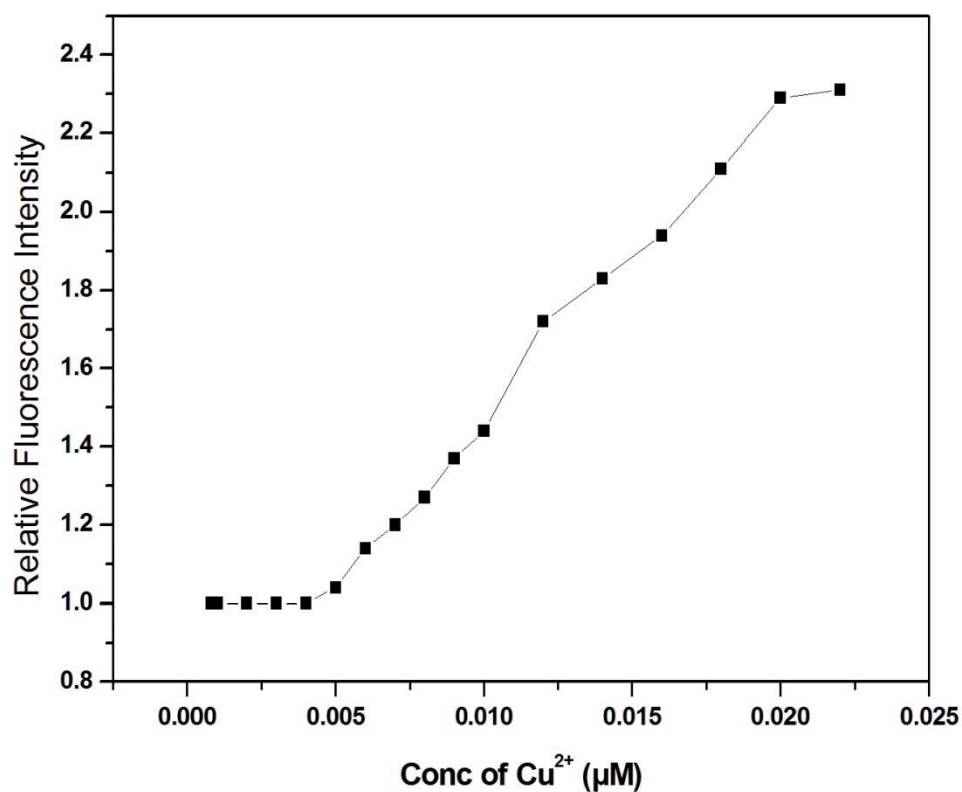

Supplement: c3ra42109k.pdf [file c3ra42109k.pdf]
